# Supplementary material
Source: HighWire-hosted journal article supplement (https://bmjopen.bmj.com/content/13/3/e068497)
Supplement: inline-supplementary-material-1 [file inline-supplementary-material-1.pdf]

**Supplementary Table S1. Participant characteristics in the low and high complexity groups**

|                                                                                                     | Low complexity group |              |              |              | High complexity group |              |             |             |
|-----------------------------------------------------------------------------------------------------|----------------------|--------------|--------------|--------------|-----------------------|--------------|-------------|-------------|
|                                                                                                     | 1                    | 2            | 3            | 4            | 1                     | 2            | 3           | 4           |
| Number of participants                                                                              | 106                  | 58           | 70           | 71           | 16                    | 11           | 10          | 13          |
|                                                                                                     | No.<br>(%)           | No.<br>(%)   | No.<br>(%)   | No.<br>(%)   | No.<br>(%)            | No.<br>(%)   | No.<br>(%)  | No.<br>(%)  |
| Age-group                                                                                           |                      |              |              |              |                       |              |             |             |
| <60 years                                                                                           | 41<br>(38.7)         | 14<br>(24.1) | 20<br>(28.6) | 17<br>(23.9) | 7<br>(43.8)           | 3<br>(27.3)  | 3<br>(30.0) | 3<br>(23.1) |
| 60–79years                                                                                          | 50<br>(47.2)         | 37<br>(63.8) | 32<br>(45.7) | 39<br>(54.9) | 5<br>(31.3)           | 7<br>(63.6)  | 6<br>(60.0) | 7<br>(53.9) |
| ≥80 years                                                                                           | 15<br>(14.2)         | 7<br>(12.1)  | 18<br>(25.7) | 15<br>(21.1) | 4<br>(25.0)           | 1<br>(9.1)   | 1<br>(10.0) | 3<br>(23.1) |
| Sex                                                                                                 |                      |              |              |              |                       |              |             |             |
| Female                                                                                              | 58<br>(54.7)         | 29<br>(50.0) | 30<br>(42.9) | 24<br>(33.8) | 8<br>(50.0)           | 4<br>(36.4)  | 5<br>(50.0) | 5<br>(38.5) |
| Male                                                                                                | 48<br>(45.3)         | 29<br>(50.0) | 40<br>(57.1) | 47<br>(66.2) | 8<br>(50.0)           | 7<br>(63.6)  | 5<br>(50.0) | 8<br>(61.5) |
| Marital status                                                                                      |                      |              |              |              |                       |              |             |             |
| Married                                                                                             | 88<br>(83.0)         | 44<br>(75.9) | 45<br>(64.3) | 46<br>(64.8) | 5<br>(31.3)           | 7<br>(63.6)  | 7<br>(70.0) | 4<br>(30.8) |
| Single                                                                                              | 7<br>(6.6)           | 5<br>(8.6)   | 4<br>(5.7)   | 6<br>(8.5)   | 2<br>(12.5)           | 2<br>(18.2)  | 1<br>(10.0) | 1<br>(7.7)  |
| Divorced or widowed                                                                                 | 11<br>(10.4)         | 9<br>(15.5)  | 21<br>(30.0) | 19<br>(26.8) | 9<br>(56.3)           | 2<br>(18.2)  | 2<br>(20.0) | 8<br>(61.5) |
| Living status                                                                                       |                      |              |              |              |                       |              |             |             |
| Not living alone                                                                                    | 95<br>(89.6)         | 51<br>(87.9) | 59<br>(84.3) | 52<br>(73.2) | 9<br>(56.3)           | 10<br>(90.9) | 8<br>(80.0) | 5<br>(38.5) |
| Living alone                                                                                        | 11<br>(10.4)         | 7<br>(12.1)  | 11<br>(15.7) | 19<br>(26.8) | 7<br>(43.8)           | 1<br>(9.1)   | 2<br>(20.0) | 8<br>(61.5) |
| Education                                                                                           |                      |              |              |              |                       |              |             |             |
| Elementary or junior high school                                                                    | 44<br>(41.5)         | 26<br>(44.8) | 44<br>(62.9) | 43<br>(60.6) | 9<br>(56.3)           | 6<br>(54.6)  | 8<br>(80.0) | 7<br>(53.9) |
| High school or junior high school under the old system                                              | 37<br>(34.9)         | 23<br>(40.0) | 18<br>(25.7) | 22<br>(31.0) | 5<br>(31.3)           | 4<br>(36.4)  | 1<br>(10.0) | 5<br>(38.5) |
| Vocational school, junior college, technical school, university, college, graduate school, or other | 25<br>(23.6)         | 9<br>(15.5)  | 8<br>(11.4)  | 6<br>(8.5)   | 2<br>(12.5)           | 1<br>(9.1)   | 1<br>(10.0) | 1<br>(7.7)  |
| Work status                                                                                         |                      |              |              |              |                       |              |             |             |
| Working                                                                                             | 101<br>(95.3)        | 54<br>(93.1) | 63<br>(90.0) | 57<br>(80.3) | 10<br>(62.5)          | 8<br>(72.7)  | 7<br>(70.0) | 7<br>(53.9) |
| Not working                                                                                         | 5<br>(4.7)           | 4<br>(6.9)   | 7<br>(10.0)  | 14<br>(19.7) | 6<br>(37.5)           | 3<br>(27.3)  | 3<br>(30.0) | 6<br>(46.2) |

|                                                  |                |               |               |              |               |              |               |               |
|--------------------------------------------------|----------------|---------------|---------------|--------------|---------------|--------------|---------------|---------------|
| Public assistance                                |                |               |               |              |               |              |               |               |
| Not receiving                                    | 106<br>(100.0) | 58<br>(100.0) | 70<br>(100.0) | 68<br>(95.8) | 13<br>(81.3)  | 10<br>(90.9) | 9<br>(90.0)   | 11<br>(84.6)  |
| Receiving                                        | 0<br>(0.0)     | 0<br>(0.0)    | 0<br>(0.0)    | 3<br>(4.2)   | 3<br>(18.8)   | 1<br>(9.1)   | 1<br>(10.0)   | 2<br>(15.4)   |
| Physical activity                                |                |               |               |              |               |              |               |               |
| Exercising                                       | 19<br>(17.9)   | 10<br>(17.2)  | 7<br>(10.0)   | 15<br>(21.1) | 0<br>(0.0)    | 1<br>(9.1)   | 1<br>(10.0)   | 0<br>(0.0)    |
| Not exercising                                   | 87<br>(82.1)   | 48<br>(82.8)  | 63<br>(90.0)  | 56<br>(78.9) | 16<br>(100.0) | 10<br>(90.9) | 9<br>(90.0)   | 13<br>(100.0) |
| Smoking status                                   |                |               |               |              |               |              |               |               |
| Ex-smoker/never smoker                           | 98<br>(92.5)   | 54<br>(93.1)  | 59<br>(84.3)  | 57<br>(80.3) | 12<br>(75.0)  | 9<br>(81.8)  | 7<br>(70.0)   | 9<br>(69.2)   |
| Current smoker                                   | 8<br>(7.6)     | 4<br>(6.9)    | 11<br>(15.7)  | 14<br>(19.7) | 4<br>(25.0)   | 2<br>(18.2)  | 3<br>(30.0)   | 4<br>(30.8)   |
| Alcohol intake                                   |                |               |               |              |               |              |               |               |
| No problematic drinking                          | 79<br>(74.5)   | 37<br>(63.8)  | 48<br>(68.6)  | 45<br>(63.4) | 12<br>(75.0)  | 7<br>(63.6)  | 7<br>(70.0)   | 9<br>(69.2)   |
| Problematic drinking                             | 27<br>(25.5)   | 21<br>(36.2)  | 22<br>(31.4)  | 26<br>(36.2) | 4<br>(25.0)   | 4<br>(36.4)  | 3<br>(30.0)   | 4<br>(30.8)   |
| ICPC-2                                           |                |               |               |              |               |              |               |               |
| General and unspecified                          | 0<br>(0.0)     | 0<br>(0.0)    | 0<br>(0.0)    | 1<br>(1.4)   | 0<br>(0.0)    | 0<br>(0.0)   | 0<br>(0.0)    | 0<br>(0.0)    |
| Blood, blood forming organs and immune mechanism | 3<br>(2.8)     | 3<br>(5.2)    | 1<br>(1.4)    | 1<br>(1.4)   | 0<br>(0.0)    | 0<br>(0.0)   | 1<br>(10.0)   | 1<br>(7.7)    |
| Digestive                                        | 21<br>(19.8)   | 14<br>(24.1)  | 11<br>(15.7)  | 16<br>(22.5) | 1<br>(6.3)    | 3<br>(27.3)  | 3<br>(30.0)   | 6<br>(46.2)   |
| Eye                                              | 6<br>(5.7)     | 2<br>(3.5)    | 11<br>(15.7)  | 7<br>(9.9)   | 2<br>(12.5)   | 2<br>(18.2)  | 2<br>(20.0)   | 3<br>(23.1)   |
| Ear                                              | 1<br>(0.9)     | 4<br>(6.9)    | 4<br>(5.7)    | 5<br>(7.0)   | 0<br>(0.0)    | 1<br>(9.1)   | 1<br>(10.0)   | 0<br>(0.0)    |
| Cardiovascular                                   | 76<br>(71.7)   | 49<br>(84.5)  | 57<br>(81.4)  | 55<br>(77.5) | 15<br>(93.8)  | 10<br>(90.9) | 10<br>(100.0) | 9<br>(69.2)   |
| Musculoskeletal                                  | 29<br>(27.4)   | 19<br>(32.8)  | 29<br>(41.4)  | 20<br>(28.2) | 7<br>(43.8)   | 2<br>(18.2)  | 5<br>(50.0)   | 4<br>(30.8)   |
| Neurological                                     | 8<br>(7.6)     | 6<br>(10.3)   | 22<br>(31.4)  | 18<br>(25.4) | 8<br>(50.0)   | 5<br>(45.5)  | 4<br>(40.0)   | 2<br>(15.4)   |
| Psychological                                    | 5<br>(4.7)     | 3<br>(5.2)    | 5<br>(7.1)    | 14<br>(19.7) | 3<br>(18.8)   | 2<br>(18.2)  | 3<br>(30.0)   | 8<br>(61.5)   |
| Respiratory                                      | 7<br>(6.6)     | 2<br>(3.5)    | 5<br>(7.1)    | 7<br>(9.9)   | 3<br>(18.8)   | 1<br>(9.1)   | 2<br>(20.0)   | 1<br>(7.7)    |
| Skin                                             | 6<br>(5.7)     | 1<br>(1.7)    | 4<br>(5.7)    | 5<br>(7.0)   | 2<br>(12.5)   | 0<br>(0.0)   | 0<br>(0.0)    | 0<br>(0.0)    |

|                                           |              |              |              |              |             |               |             |              |
|-------------------------------------------|--------------|--------------|--------------|--------------|-------------|---------------|-------------|--------------|
| Endocrine/metabolic and nutritional       | 62<br>(58.5) | 42<br>(72.4) | 51<br>(72.9) | 54<br>(76.1) | 9<br>(56.3) | 11<br>(100.0) | 9<br>(90.0) | 10<br>(76.9) |
| Urological                                | 12<br>(11.3) | 1<br>(1.7)   | 4<br>(5.7)   | 4<br>(5.6)   | 1<br>(6.3)  | 1<br>(9.1)    | 2<br>(20.0) | 0<br>(0.0)   |
| Pregnancy, childbearing, family planning  | 0<br>(0.0)   | 0<br>(0.0)   | 0<br>(0.0)   | 0<br>(0.0)   | 0<br>(0.0)  | 0<br>(0.0)    | 0<br>(0.0)  | 0<br>(0.0)   |
| Genital (female genital and male genital) | 6<br>(5.7)   | 4<br>(6.9)   | 6<br>(8.6)   | 5<br>(7.0)   | 1<br>(6.3)  | 0<br>(0.0)    | 2<br>(20.0) | 1<br>(7.7)   |
| Social problems                           | 0<br>(0.0)   | 0<br>(0.0)   | 0<br>(0.0)   | 0<br>(0.0)   | 0<br>(0.0)  | 0<br>(0.0)    | 0<br>(0.0)  | 0<br>(0.0)   |

We designated the low complexity 1, low complexity 2, low complexity 3, and low complexity 4 groups as  $\leq 17$ ,  $>17$  and  $\leq 19$ ,  $>19$  and  $\leq 22$ , and  $>22$  and  $\leq 27$  of the Patient Centered Assessment Method (PCAM) total scores, respectively. We designated the high complexity 1, high complexity 2, high complexity 3, and high complexity 4 groups as  $>27$  and  $\leq 29$ ,  $>29$  and  $\leq 31$ ,  $>31$  and  $\leq 33$ , and  $>33$  of the PCAM total scores, respectively. ICPC-2, International Classification of Primary Care, 2nd edition.

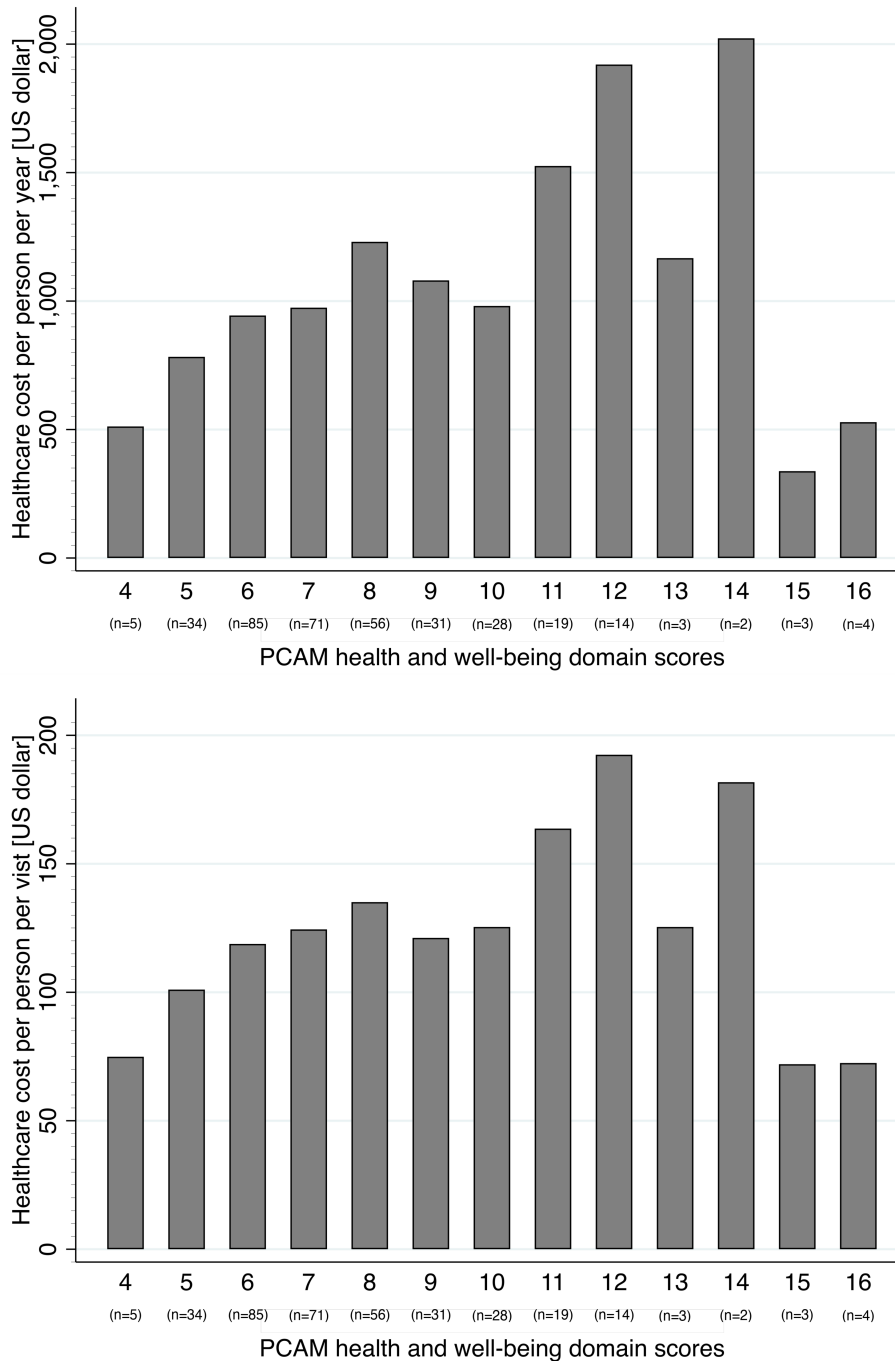

**Figure S1. Healthcare costs per person per year/visit and PCAM health and well-being domain scores.** PCAM, Patient Centered Assessment Method.

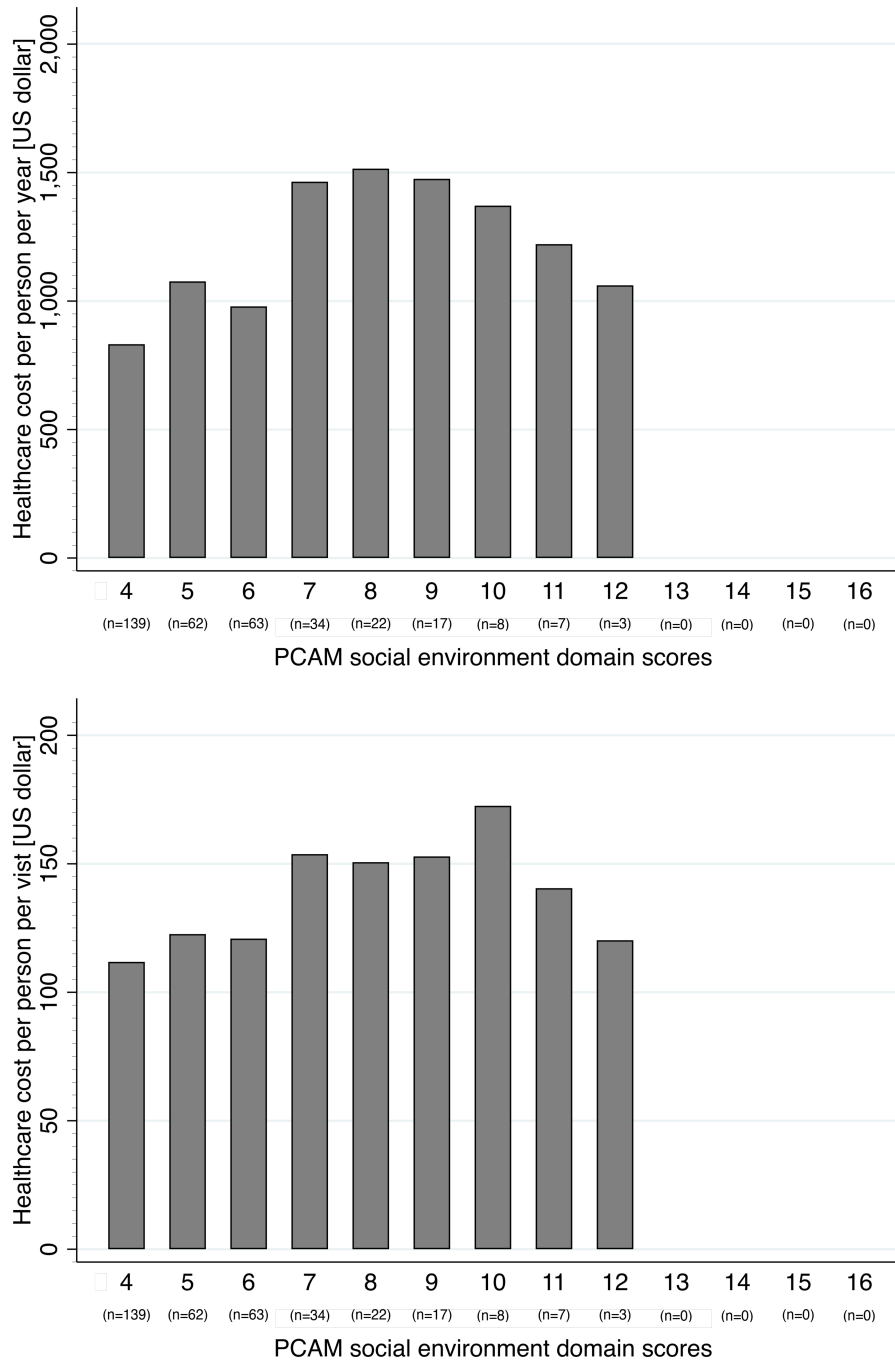

**Figure S2. Healthcare costs per person per year/visit and PCAM social environment domain scores.** PCAM, Patient Centered Assessment Method.

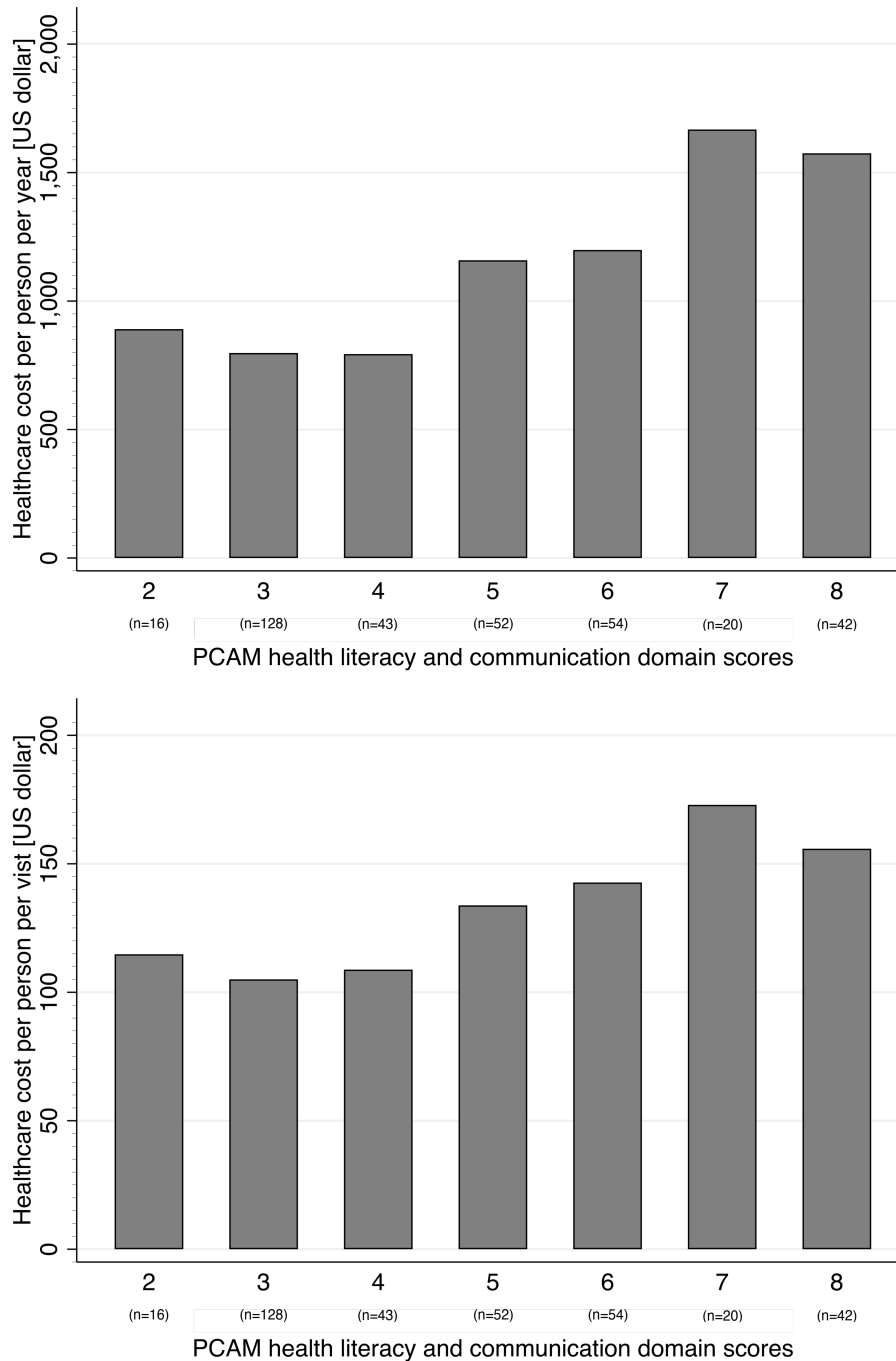

**Figure S3. Healthcare costs per person per year/visit and PCAM health literacy and communication domain scores.**

PCAM, Patient Centered Assessment Method.

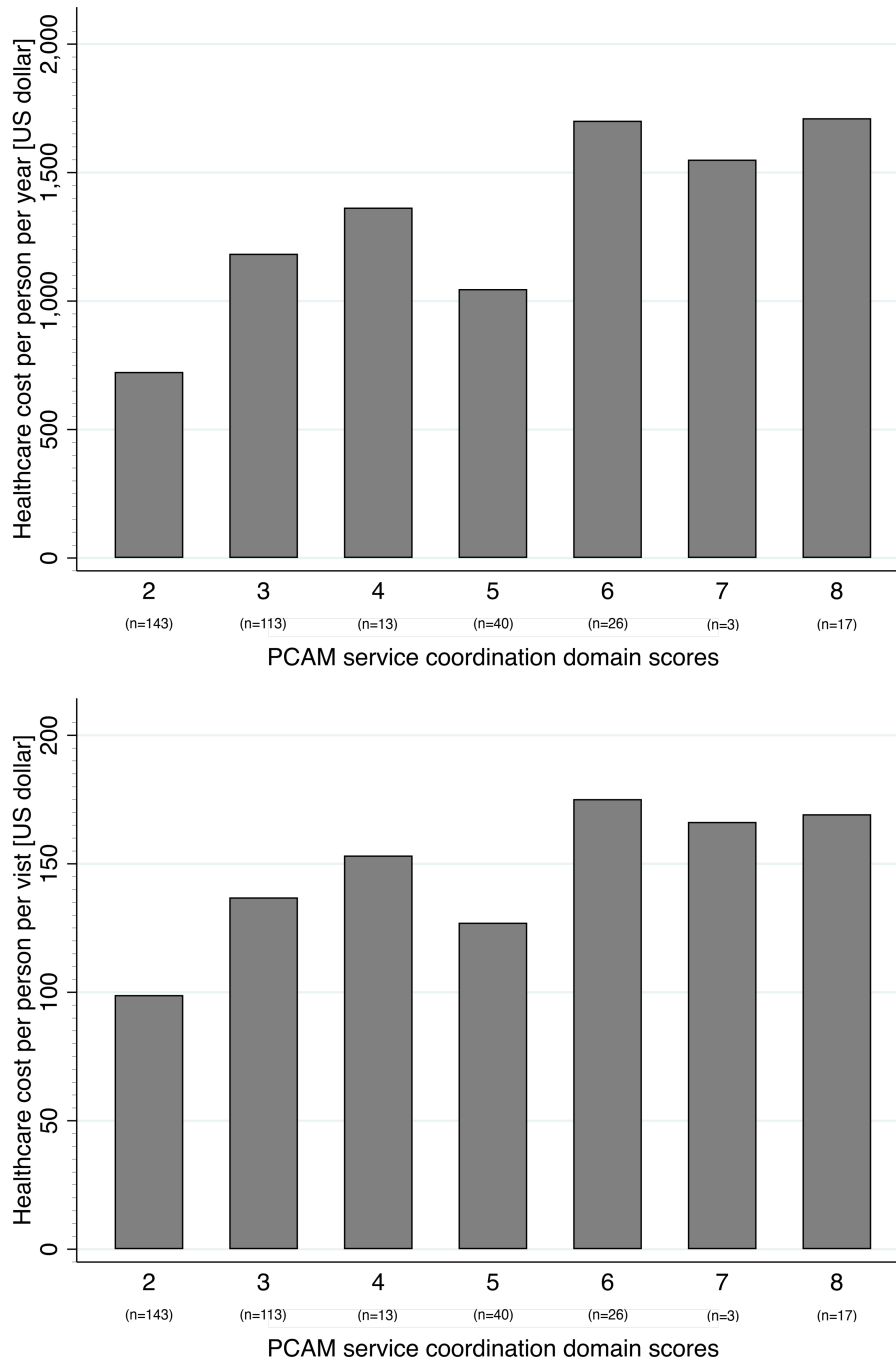

**Figure S4. Healthcare costs per person per year/visit and service coordination domain scores.** PCAM, Patient Centered Assessment Method.
